# Supplementary material for: Designing strategies to implement a blunt chest injury care bundle using the behaviour change wheel: a multi-site mixed methods study
Source: Springer Nature journal article supplement (doi:10.1186/s12913-019-4177-z), 2019-07-08
Supplement: MOESM1 [file 16907522]

# ChIP facilitators and barriers study

Thank you for taking the time to complete this survey. This survey is the first part of a multi-phased research project to implement and evaluate a Bundle of Care for patients with isolated blunt chest wall injury (ChIP).

This survey (phase 1) aims to identify the facilitators and barriers relating to the implementation of this new protocol at Wollongong and Shoalhaven Hospitals. Your responses will be anonymous.

Please ensure you have read the participant information sheet prior to continuing.

Thank you!

PLEASE NOTE YOU CAN CONTROL THE FONT SIZE FROM ZOOM BUTTONS IN TOP RIGHT-HAND CORNER OF YOUR SCREEN

You will have unlimited time to complete this survey, however, if you log out prior to completion, your responses will not be saved.

Participant information Sheet

Please take the time to read

[Attachment: "Participant information sheet v9\_180317.pdf"]

---

---

**Demographic Information**

Which hospital do you work at?

- Wollongong Hospital
- Shoalhaven Memorial District Hospital
- Other
- Both TWH and SMDH

Thank you for completing our survey.

- Please close the browser window

At this time, we are only surveying people who are current employees of The Wollongong or Shoalhaven Memorial Hospitals.

For more information please contact sarah.kourouche@sydney.edu.au

What is your gender?

- Male
- Female

What is your age?

\_\_\_\_\_ (in years)

What is your clinical department and role? (please select appropriate box)

- Anaesthetics - Doctor
- Surgical - Doctor
- Emergency - Doctor or Nurse
- Other e.g. specialist nurses, physiotherapists, non-clinical staff
- Respiratory - Doctor

Please select your current role

- Consultant / VMO
- Registrar / Fellow
- Resident / Intern

Please select your current role

- Consultant
- Fellow / Registrar
- Resident / Intern

Please select your current role

- Registered nurse (RN)
- Endorsed / Enrolled nurse (EEN/EN)
- Clinical Nurse Specialist (CNS)
- Staff Specialist / VMO
- Registrar / CMO
- Resident / Intern
- Senior nurse (Nursing unit manager, Nursing educator, Clinical nurse educator, Clinical nurse consultant etc)

Please select your current role

- Physiotherapy
- Switchboard
- Senior specialist nurse eg trauma, pain service, ICU liason etc

How long have you been in this role? Please answer in years

\_\_\_\_\_ (Number response ONLY (in years))

e.g. 6 months = 0.5

---



---

## Knowledge and Skills

Our hospital has a clinical protocol for the care of patients with blunt chest injuries (select one)

- Yes  
 No  
 Don't know

|                                                                                                 | Never                 | Very rarely           | Rarely                | Occasionally          | Most of the time      | Always                |
|-------------------------------------------------------------------------------------------------|-----------------------|-----------------------|-----------------------|-----------------------|-----------------------|-----------------------|
| If I am caring for a patient with blunt chest injury, I know exactly what treatment to initiate | <input type="radio"/> | <input type="radio"/> | <input type="radio"/> | <input type="radio"/> | <input type="radio"/> | <input type="radio"/> |

Please select the risk factors you feel are most likely to lead to deterioration for patients with blunt chest injuries

(Select all that apply)

- Diabetes  
 Elderly  
 Childhood asthma  
 COPD / Chronic lung disease  
 3 or more rib fractures  
 Myocardial infarction  
 (Select all that apply)

I am familiar with the term "care bundle" (select one)

- Yes  
 No

A care bundle is: (select one)

- A guideline for the care of patients  
 A group of key evidence-based interventions for a specific condition  
 A pathway for care of a specific patient  
 A recommendation for patient care

---



---

## How important are the following interventions in the management of patients with blunt chest injuries?

(select your response on the scale for each intervention)

|                                                                                                                                       | Not Important         | Slightly Important    | Moderately Important  | Important             | Very important        |
|---------------------------------------------------------------------------------------------------------------------------------------|-----------------------|-----------------------|-----------------------|-----------------------|-----------------------|
| Monitoring of arterial blood gases                                                                                                    | <input type="radio"/> | <input type="radio"/> | <input type="radio"/> | <input type="radio"/> | <input type="radio"/> |
| Maintaining Oxygenation with SpO2 above 95% (or appropriate to lung condition)                                                        | <input type="radio"/> | <input type="radio"/> | <input type="radio"/> | <input type="radio"/> | <input type="radio"/> |
| Regular deep breathing and coughing exercises                                                                                         | <input type="radio"/> | <input type="radio"/> | <input type="radio"/> | <input type="radio"/> | <input type="radio"/> |
| Early analgesia                                                                                                                       | <input type="radio"/> | <input type="radio"/> | <input type="radio"/> | <input type="radio"/> | <input type="radio"/> |
| Regular multi-modal analgesia                                                                                                         | <input type="radio"/> | <input type="radio"/> | <input type="radio"/> | <input type="radio"/> | <input type="radio"/> |
| Patient controlled analgesia (opioid)                                                                                                 | <input type="radio"/> | <input type="radio"/> | <input type="radio"/> | <input type="radio"/> | <input type="radio"/> |
| Multidisciplinary approach with doctors, nurses and allied health professionals involved                                              | <input type="radio"/> | <input type="radio"/> | <input type="radio"/> | <input type="radio"/> | <input type="radio"/> |
| Monitoring of chest x-rays                                                                                                            | <input type="radio"/> | <input type="radio"/> | <input type="radio"/> | <input type="radio"/> | <input type="radio"/> |
| Early chest physiotherapy in the ED                                                                                                   | <input type="radio"/> | <input type="radio"/> | <input type="radio"/> | <input type="radio"/> | <input type="radio"/> |
| Chest wall splinting while coughing/deep breathing                                                                                    | <input type="radio"/> | <input type="radio"/> | <input type="radio"/> | <input type="radio"/> | <input type="radio"/> |
| Regular chest physiotherapy                                                                                                           | <input type="radio"/> | <input type="radio"/> | <input type="radio"/> | <input type="radio"/> | <input type="radio"/> |
| Frequent reassessment of respiratory function                                                                                         | <input type="radio"/> | <input type="radio"/> | <input type="radio"/> | <input type="radio"/> | <input type="radio"/> |
| Regular Incentive spirometry (e.g. TRIFLO). Device with 3 chambers each with a ball, patient required to blow so that the balls rise. | <input type="radio"/> | <input type="radio"/> | <input type="radio"/> | <input type="radio"/> | <input type="radio"/> |
| Early mobilization                                                                                                                    | <input type="radio"/> | <input type="radio"/> | <input type="radio"/> | <input type="radio"/> | <input type="radio"/> |
| Surgical fixation of rib fractures                                                                                                    | <input type="radio"/> | <input type="radio"/> | <input type="radio"/> | <input type="radio"/> | <input type="radio"/> |
| Clinical protocols for analgesia                                                                                                      | <input type="radio"/> | <input type="radio"/> | <input type="radio"/> | <input type="radio"/> | <input type="radio"/> |

Any further comments?

---

(Free text)

---



---

**I am confident in my ability to accurately.....**
**(Select your response on the scale for each intervention)**

|                                                                              | Strongly<br>Disagree  | Disagree              | Slightly<br>Disagree  | Slightly Agree        | Agree                 | Strongly<br>Agree     |
|------------------------------------------------------------------------------|-----------------------|-----------------------|-----------------------|-----------------------|-----------------------|-----------------------|
| Locate landmarks to listen to a patient's chest                              | <input type="radio"/> | <input type="radio"/> | <input type="radio"/> | <input type="radio"/> | <input type="radio"/> | <input type="radio"/> |
| Assess a patient's respiratory effort                                        | <input type="radio"/> | <input type="radio"/> | <input type="radio"/> | <input type="radio"/> | <input type="radio"/> | <input type="radio"/> |
| Assess pleuritic pain                                                        | <input type="radio"/> | <input type="radio"/> | <input type="radio"/> | <input type="radio"/> | <input type="radio"/> | <input type="radio"/> |
| Interpret findings from my assessment of a patient's respiratory function    | <input type="radio"/> | <input type="radio"/> | <input type="radio"/> | <input type="radio"/> | <input type="radio"/> | <input type="radio"/> |
| Describe findings from assessment of respiratory function                    | <input type="radio"/> | <input type="radio"/> | <input type="radio"/> | <input type="radio"/> | <input type="radio"/> | <input type="radio"/> |
| Instruct a patient in the use of Incentive spirometer (TRIFLO)               | <input type="radio"/> | <input type="radio"/> | <input type="radio"/> | <input type="radio"/> | <input type="radio"/> | <input type="radio"/> |
| Monitor for deterioration in a patient with blunt chest injury               | <input type="radio"/> | <input type="radio"/> | <input type="radio"/> | <input type="radio"/> | <input type="radio"/> | <input type="radio"/> |
| Set up high flow nasal prongs                                                | <input type="radio"/> | <input type="radio"/> | <input type="radio"/> | <input type="radio"/> | <input type="radio"/> | <input type="radio"/> |
| Prescribe high flow nasal prongs                                             | <input type="radio"/> | <input type="radio"/> | <input type="radio"/> | <input type="radio"/> | <input type="radio"/> | <input type="radio"/> |
| Titrate flow rates for high flow nasal prongs                                | <input type="radio"/> | <input type="radio"/> | <input type="radio"/> | <input type="radio"/> | <input type="radio"/> | <input type="radio"/> |
| Prescribe appropriate analgesia for blunt chest injury                       | <input type="radio"/> | <input type="radio"/> | <input type="radio"/> | <input type="radio"/> | <input type="radio"/> | <input type="radio"/> |
| Prescribe appropriate epidural analgesia for blunt chest injury              | <input type="radio"/> | <input type="radio"/> | <input type="radio"/> | <input type="radio"/> | <input type="radio"/> | <input type="radio"/> |
| Prescribe appropriate oral opioid analgesia for blunt chest injury           | <input type="radio"/> | <input type="radio"/> | <input type="radio"/> | <input type="radio"/> | <input type="radio"/> | <input type="radio"/> |
| Prescribe appropriate paravertebral block analgesia for blunt chest injury   | <input type="radio"/> | <input type="radio"/> | <input type="radio"/> | <input type="radio"/> | <input type="radio"/> | <input type="radio"/> |
| Prescribe appropriate Patient Controlled Analgesia for blunt chest injury    | <input type="radio"/> | <input type="radio"/> | <input type="radio"/> | <input type="radio"/> | <input type="radio"/> | <input type="radio"/> |
| Prescribe (including nurse initiated/standing orders) early opioid analgesia | <input type="radio"/> | <input type="radio"/> | <input type="radio"/> | <input type="radio"/> | <input type="radio"/> | <input type="radio"/> |
| Manage epidural analgesia for blunt chest injury                             | <input type="radio"/> | <input type="radio"/> | <input type="radio"/> | <input type="radio"/> | <input type="radio"/> | <input type="radio"/> |

|                                                              |                       |                       |                       |                       |                       |                       |
|--------------------------------------------------------------|-----------------------|-----------------------|-----------------------|-----------------------|-----------------------|-----------------------|
| Manage oral opioid analgesia for blunt chest injury          | <input type="radio"/> | <input type="radio"/> | <input type="radio"/> | <input type="radio"/> | <input type="radio"/> | <input type="radio"/> |
| Manage intramuscular opioid analgesia for blunt chest injury | <input type="radio"/> | <input type="radio"/> | <input type="radio"/> | <input type="radio"/> | <input type="radio"/> | <input type="radio"/> |
| Manage intravenous opioid analgesia for blunt chest injury   | <input type="radio"/> | <input type="radio"/> | <input type="radio"/> | <input type="radio"/> | <input type="radio"/> | <input type="radio"/> |
| Manage paravertebral block analgesia for blunt chest injury  | <input type="radio"/> | <input type="radio"/> | <input type="radio"/> | <input type="radio"/> | <input type="radio"/> | <input type="radio"/> |
| Manage Patient Controlled Analgesia for blunt chest injury   | <input type="radio"/> | <input type="radio"/> | <input type="radio"/> | <input type="radio"/> | <input type="radio"/> | <input type="radio"/> |

Any further comments?

\_\_\_\_\_  
(Free text)

---

---

**Select your response in relation to your experience with clinical protocols**

|                                                                     | Never                 | Very rarely           | Rarely                | Occasionally          | Most of the time      | Always                |
|---------------------------------------------------------------------|-----------------------|-----------------------|-----------------------|-----------------------|-----------------------|-----------------------|
| I find it easy to remember when to activate new protocols           | <input type="radio"/> | <input type="radio"/> | <input type="radio"/> | <input type="radio"/> | <input type="radio"/> | <input type="radio"/> |
| During my work day I think there are too many protocols to remember | <input type="radio"/> | <input type="radio"/> | <input type="radio"/> | <input type="radio"/> | <input type="radio"/> | <input type="radio"/> |

Any further comments?

---

(Free text)

---



---

**How important are the following environmental factors in helping you remember to use clinical protocols.....**

**Please select on the scale**

|                                                   | Not Important         | Slightly Important    | Moderately Important  | Important             | Very important        |
|---------------------------------------------------|-----------------------|-----------------------|-----------------------|-----------------------|-----------------------|
| Having a guideline on the intranet/internet       | <input type="radio"/> | <input type="radio"/> | <input type="radio"/> | <input type="radio"/> | <input type="radio"/> |
| A form with a checklist kept in the patient notes | <input type="radio"/> | <input type="radio"/> | <input type="radio"/> | <input type="radio"/> | <input type="radio"/> |
| Flyers around the department                      | <input type="radio"/> | <input type="radio"/> | <input type="radio"/> | <input type="radio"/> | <input type="radio"/> |
| Email reminders                                   | <input type="radio"/> | <input type="radio"/> | <input type="radio"/> | <input type="radio"/> | <input type="radio"/> |
| Simple criteria for activation                    | <input type="radio"/> | <input type="radio"/> | <input type="radio"/> | <input type="radio"/> | <input type="radio"/> |
| Having equipment easily accessible                | <input type="radio"/> | <input type="radio"/> | <input type="radio"/> | <input type="radio"/> | <input type="radio"/> |
| Sticker placed in patient notes                   | <input type="radio"/> | <input type="radio"/> | <input type="radio"/> | <input type="radio"/> | <input type="radio"/> |
| emR tick box or icon                              | <input type="radio"/> | <input type="radio"/> | <input type="radio"/> | <input type="radio"/> | <input type="radio"/> |

Any further comments?

---

(free text)



---



---

**Please rate how important (or not important) the following factors are in improving your use of clinical protocols:**

**Select from the scale**

|                                                                 | Not Important         | Slightly Important    | Moderately Important  | Important             | Very important        |
|-----------------------------------------------------------------|-----------------------|-----------------------|-----------------------|-----------------------|-----------------------|
| Knowing I will be spoken to by a superior if I do not follow it | <input type="radio"/> | <input type="radio"/> | <input type="radio"/> | <input type="radio"/> | <input type="radio"/> |
| Knowing I am being audited                                      | <input type="radio"/> | <input type="radio"/> | <input type="radio"/> | <input type="radio"/> | <input type="radio"/> |
| Feeling that the protocol will make a difference to the patient | <input type="radio"/> | <input type="radio"/> | <input type="radio"/> | <input type="radio"/> | <input type="radio"/> |
| Other staff reminding me to                                     | <input type="radio"/> | <input type="radio"/> | <input type="radio"/> | <input type="radio"/> | <input type="radio"/> |
| Identifying myself as a "change agent"                          | <input type="radio"/> | <input type="radio"/> | <input type="radio"/> | <input type="radio"/> | <input type="radio"/> |
| Being aware of risks associated with not following a protocol   | <input type="radio"/> | <input type="radio"/> | <input type="radio"/> | <input type="radio"/> | <input type="radio"/> |

Please add any further comments here

---

(free text)

---



---

**You're halfway! Please keep going your answers are highly valuable.**

**How likely are the following factors going to prevent you using protocols?**

|                                                                         | Not at all            | Somewhat              | Moderately            | Very much so          |
|-------------------------------------------------------------------------|-----------------------|-----------------------|-----------------------|-----------------------|
| Too busy / interruptions eg with other patients, in OT, phone calls etc | <input type="radio"/> | <input type="radio"/> | <input type="radio"/> | <input type="radio"/> |
| No access to computer to access protocol / document                     | <input type="radio"/> | <input type="radio"/> | <input type="radio"/> | <input type="radio"/> |
| No access to phone to page / answer pager                               | <input type="radio"/> | <input type="radio"/> | <input type="radio"/> | <input type="radio"/> |
| Under staffed                                                           | <input type="radio"/> | <input type="radio"/> | <input type="radio"/> | <input type="radio"/> |
| Inadequate training in protocol use                                     | <input type="radio"/> | <input type="radio"/> | <input type="radio"/> | <input type="radio"/> |
| Can't find protocol when I need it                                      | <input type="radio"/> | <input type="radio"/> | <input type="radio"/> | <input type="radio"/> |
| Protocol not clear                                                      | <input type="radio"/> | <input type="radio"/> | <input type="radio"/> | <input type="radio"/> |
| I have my own process / way of doing things                             | <input type="radio"/> | <input type="radio"/> | <input type="radio"/> | <input type="radio"/> |

Any further comments?

---

(Free text)

---

---

**How important are each of the strategies below in helping you to use and adhere to protocols in your workplace?****Select response on the scale**

|                                                 | Not Important         | Slightly Important    | Moderately Important  | Important             | Very important        |
|-------------------------------------------------|-----------------------|-----------------------|-----------------------|-----------------------|-----------------------|
| Support from supervisor / manager               | <input type="radio"/> | <input type="radio"/> | <input type="radio"/> | <input type="radio"/> | <input type="radio"/> |
| Step by step instructions                       | <input type="radio"/> | <input type="radio"/> | <input type="radio"/> | <input type="radio"/> | <input type="radio"/> |
| Concise flowchart                               | <input type="radio"/> | <input type="radio"/> | <input type="radio"/> | <input type="radio"/> | <input type="radio"/> |
| Localised place for all protocols               | <input type="radio"/> | <input type="radio"/> | <input type="radio"/> | <input type="radio"/> | <input type="radio"/> |
| Protocols kept electronically                   | <input type="radio"/> | <input type="radio"/> | <input type="radio"/> | <input type="radio"/> | <input type="radio"/> |
| Protocols up as posters in clinical environment | <input type="radio"/> | <input type="radio"/> | <input type="radio"/> | <input type="radio"/> | <input type="radio"/> |

Any further comments?

---

(Free text)

---

---

**I am more likely to follow a new protocol if I have support from.....**

**(Select your response on the scale for each support source):**

|                      | Strongly Disagree     | Disagree              | Slightly disagree     | Slightly agree        | Agree                 | Strongly Agree        |
|----------------------|-----------------------|-----------------------|-----------------------|-----------------------|-----------------------|-----------------------|
| My superiors         | <input type="radio"/> | <input type="radio"/> | <input type="radio"/> | <input type="radio"/> | <input type="radio"/> | <input type="radio"/> |
| Medical staff        | <input type="radio"/> | <input type="radio"/> | <input type="radio"/> | <input type="radio"/> | <input type="radio"/> | <input type="radio"/> |
| Nursing staff        | <input type="radio"/> | <input type="radio"/> | <input type="radio"/> | <input type="radio"/> | <input type="radio"/> | <input type="radio"/> |
| My colleagues        | <input type="radio"/> | <input type="radio"/> | <input type="radio"/> | <input type="radio"/> | <input type="radio"/> | <input type="radio"/> |
| The patient          | <input type="radio"/> | <input type="radio"/> | <input type="radio"/> | <input type="radio"/> | <input type="radio"/> | <input type="radio"/> |
| The patient's family | <input type="radio"/> | <input type="radio"/> | <input type="radio"/> | <input type="radio"/> | <input type="radio"/> | <input type="radio"/> |

Any further comments?

\_\_\_\_\_ (Free text)

---



---

**How important are the following educational supports in using a new protocol?**

**(Select your response on the scale for each intervention)**

|                                     | Not Important         | Slightly Important    | Moderately Important  | Important             | Very important        |
|-------------------------------------|-----------------------|-----------------------|-----------------------|-----------------------|-----------------------|
| A short course on the protocol      | <input type="radio"/> | <input type="radio"/> | <input type="radio"/> | <input type="radio"/> | <input type="radio"/> |
| An online learning program          | <input type="radio"/> | <input type="radio"/> | <input type="radio"/> | <input type="radio"/> | <input type="radio"/> |
| Help on the floor from senior staff | <input type="radio"/> | <input type="radio"/> | <input type="radio"/> | <input type="radio"/> | <input type="radio"/> |
| An in-service on the protocol       | <input type="radio"/> | <input type="radio"/> | <input type="radio"/> | <input type="radio"/> | <input type="radio"/> |
| My colleagues reminding me          | <input type="radio"/> | <input type="radio"/> | <input type="radio"/> | <input type="radio"/> | <input type="radio"/> |

Do you have other comments relating to educational support provided? Please provide detail

---

---



---

**It is my role to .....**

**(Select your response on the scale for each option):**

|                                                                                   | Strongly Disagree                | Disagree              | Slightly Agree        | Agree                 | Strongly Agree        |
|-----------------------------------------------------------------------------------|----------------------------------|-----------------------|-----------------------|-----------------------|-----------------------|
| Assess patients with blunt chest injury                                           | <input checked="" type="radio"/> | <input type="radio"/> | <input type="radio"/> | <input type="radio"/> | <input type="radio"/> |
| Refer patients with blunt chest injury to a physiotherapist                       | <input type="radio"/>            | <input type="radio"/> | <input type="radio"/> | <input type="radio"/> | <input type="radio"/> |
| Prescribe analgesia for patients with blunt chest injury                          | <input type="radio"/>            | <input type="radio"/> | <input type="radio"/> | <input type="radio"/> | <input type="radio"/> |
| Assess and recognise if a patient with blunt chest injury needs further analgesia | <input type="radio"/>            | <input type="radio"/> | <input type="radio"/> | <input type="radio"/> | <input type="radio"/> |
| Decide if a patient with blunt chest injury needs admission                       | <input type="radio"/>            | <input type="radio"/> | <input type="radio"/> | <input type="radio"/> | <input type="radio"/> |
| Identify and escalate a deteriorating patient with blunt chest injury             | <input type="radio"/>            | <input type="radio"/> | <input type="radio"/> | <input type="radio"/> | <input type="radio"/> |
| Care for patients on the ward with blunt chest injury                             | <input type="radio"/>            | <input type="radio"/> | <input type="radio"/> | <input type="radio"/> | <input type="radio"/> |
| Mobilise patients with blunt chest injury                                         | <input type="radio"/>            | <input type="radio"/> | <input type="radio"/> | <input type="radio"/> | <input type="radio"/> |

Any further comments?

---

(Free text)

---



---

**Almost finished! Thank you for your persistence.**

**I am confident I.....**

**(Select response on the scale for each option):**

|                                                                                              | Never                 | Rarely                | Sometimes             | Very often            | Always                |
|----------------------------------------------------------------------------------------------|-----------------------|-----------------------|-----------------------|-----------------------|-----------------------|
| Can adequately assess a patient with blunt chest injury                                      | <input type="radio"/> | <input type="radio"/> | <input type="radio"/> | <input type="radio"/> | <input type="radio"/> |
| Can identify the patients with blunt chest injury that are at higher risk of complications   | <input type="radio"/> | <input type="radio"/> | <input type="radio"/> | <input type="radio"/> | <input type="radio"/> |
| Can recognise patients with blunt chest injury who are deteriorating                         | <input type="radio"/> | <input type="radio"/> | <input type="radio"/> | <input type="radio"/> | <input type="radio"/> |
| Will know when to escalate care in a patient with blunt chest injury                         | <input type="radio"/> | <input type="radio"/> | <input type="radio"/> | <input type="radio"/> | <input type="radio"/> |
| Know when a patient with blunt chest injury can be discharged home safely or needs admission | <input type="radio"/> | <input type="radio"/> | <input type="radio"/> | <input type="radio"/> | <input type="radio"/> |

Any further comments?

---

(Free text)

---

---

**Please select how important the following statements are to you in your professional role:**

**(Select one response for each option)**

|                                                                      | Not important         | Slightly Important    | Moderately Important  | Important             | Very Important        |
|----------------------------------------------------------------------|-----------------------|-----------------------|-----------------------|-----------------------|-----------------------|
| I want to minimise my patient's risk of complications                | <input type="radio"/> | <input type="radio"/> | <input type="radio"/> | <input type="radio"/> | <input type="radio"/> |
| I want to have my patients appropriately managed as soon as possible | <input type="radio"/> | <input type="radio"/> | <input type="radio"/> | <input type="radio"/> | <input type="radio"/> |
| I want to have have my patient go to the appropriate level ward      | <input type="radio"/> | <input type="radio"/> | <input type="radio"/> | <input type="radio"/> | <input type="radio"/> |

Any further comments?

---

(Free text)



---



---

**With regards to your work at the hospital, do you agree or disagree with these statements?**

**(Select your response on the scale):**

|                                                                                                | Strongly Disagree     | Disagree              | Slightly Disagree     | Slightly Agree        | Agree                 | Strongly Agree        |
|------------------------------------------------------------------------------------------------|-----------------------|-----------------------|-----------------------|-----------------------|-----------------------|-----------------------|
| I am interested in being involved in the development of new protocols                          | <input type="radio"/> | <input type="radio"/> | <input type="radio"/> | <input type="radio"/> | <input type="radio"/> | <input type="radio"/> |
| I am interested in being involved in the implementation of new protocols                       | <input type="radio"/> | <input type="radio"/> | <input type="radio"/> | <input type="radio"/> | <input type="radio"/> | <input type="radio"/> |
| Despite any barriers that may occur, I strive to provide the best quality, evidence based care | <input type="radio"/> | <input type="radio"/> | <input type="radio"/> | <input type="radio"/> | <input type="radio"/> | <input type="radio"/> |
| Patients with blunt chest injury are provided consistent and evidence based care               | <input type="radio"/> | <input type="radio"/> | <input type="radio"/> | <input type="radio"/> | <input type="radio"/> | <input type="radio"/> |

Any further comments?

---

(Free text)

---

---

**When using new protocols in my practice, I feel.....**

**(Select a response for each):**

|                | Not at all            | Somewhat              | Moderately so         | Very much so          |
|----------------|-----------------------|-----------------------|-----------------------|-----------------------|
| Calm           | <input type="radio"/> | <input type="radio"/> | <input type="radio"/> | <input type="radio"/> |
| Secure         | <input type="radio"/> | <input type="radio"/> | <input type="radio"/> | <input type="radio"/> |
| Tense          | <input type="radio"/> | <input type="radio"/> | <input type="radio"/> | <input type="radio"/> |
| Regret         | <input type="radio"/> | <input type="radio"/> | <input type="radio"/> | <input type="radio"/> |
| At ease        | <input type="radio"/> | <input type="radio"/> | <input type="radio"/> | <input type="radio"/> |
| Upset          | <input type="radio"/> | <input type="radio"/> | <input type="radio"/> | <input type="radio"/> |
| Anxious        | <input type="radio"/> | <input type="radio"/> | <input type="radio"/> | <input type="radio"/> |
| Comfortable    | <input type="radio"/> | <input type="radio"/> | <input type="radio"/> | <input type="radio"/> |
| Self-confident | <input type="radio"/> | <input type="radio"/> | <input type="radio"/> | <input type="radio"/> |
| Nervous        | <input type="radio"/> | <input type="radio"/> | <input type="radio"/> | <input type="radio"/> |
| Jittery        | <input type="radio"/> | <input type="radio"/> | <input type="radio"/> | <input type="radio"/> |
| Content        | <input type="radio"/> | <input type="radio"/> | <input type="radio"/> | <input type="radio"/> |
| Worried        | <input type="radio"/> | <input type="radio"/> | <input type="radio"/> | <input type="radio"/> |
| Joyful         | <input type="radio"/> | <input type="radio"/> | <input type="radio"/> | <input type="radio"/> |
| Pleasant       | <input type="radio"/> | <input type="radio"/> | <input type="radio"/> | <input type="radio"/> |

What do you think makes you feel this way?

\_\_\_\_\_ (Free text)

Please comment (free text)

---

---

Patients with blunt chest injury are at risk of developing complications such as pneumonia and with inadequate treatment have higher rates of morbidity and mortality. ChIP is a protocol that is used in other hospitals and reduces risk of pneumonia by 56%. It activates an early multidisciplinary response (like a trauma call) and initiates evidence based guidelines for patients with blunt chest injury around analgesia, oxygenation, admission, and allied health reviews.

The following questions relate to this protocol. This is the last, but VERY important question :)

---



---

**If a new protocol is implemented in your hospital, that:**

**activates an early multidisciplinary response (like a trauma call) and prompts evidence based guidelines for patients with blunt chest injury**

**What impact do you think it will have on you and/or your patient with blunt chest injury on the following?**

**(Select your response on the scale for each option):**

|                                                                  | Strongly Disagree     | Disagree              | Slightly disagree     | Slightly agree        | Agree                 | Strongly Agree        |
|------------------------------------------------------------------|-----------------------|-----------------------|-----------------------|-----------------------|-----------------------|-----------------------|
| There will be improvement in patient outcomes                    | <input type="radio"/> | <input type="radio"/> | <input type="radio"/> | <input type="radio"/> | <input type="radio"/> | <input type="radio"/> |
| My workload will be greater                                      | <input type="radio"/> | <input type="radio"/> | <input type="radio"/> | <input type="radio"/> | <input type="radio"/> | <input type="radio"/> |
| My work day will be easier                                       | <input type="radio"/> | <input type="radio"/> | <input type="radio"/> | <input type="radio"/> | <input type="radio"/> | <input type="radio"/> |
| There will be no change to my work day                           | <input type="radio"/> | <input type="radio"/> | <input type="radio"/> | <input type="radio"/> | <input type="radio"/> | <input type="radio"/> |
| There will be easier access to admitting team review             | <input type="radio"/> | <input type="radio"/> | <input type="radio"/> | <input type="radio"/> | <input type="radio"/> | <input type="radio"/> |
| Patient will get earlier analgesia                               | <input type="radio"/> | <input type="radio"/> | <input type="radio"/> | <input type="radio"/> | <input type="radio"/> | <input type="radio"/> |
| There will be improved time to physiotherapy review              | <input type="radio"/> | <input type="radio"/> | <input type="radio"/> | <input type="radio"/> | <input type="radio"/> | <input type="radio"/> |
| There will be improved time to medical review                    | <input type="radio"/> | <input type="radio"/> | <input type="radio"/> | <input type="radio"/> | <input type="radio"/> | <input type="radio"/> |
| There will be reduced length of time in the emergency department | <input type="radio"/> | <input type="radio"/> | <input type="radio"/> | <input type="radio"/> | <input type="radio"/> | <input type="radio"/> |
| The patient will have earlier referral to aged care              | <input type="radio"/> | <input type="radio"/> | <input type="radio"/> | <input type="radio"/> | <input type="radio"/> | <input type="radio"/> |
| There will be overall improvement in patient care                | <input type="radio"/> | <input type="radio"/> | <input type="radio"/> | <input type="radio"/> | <input type="radio"/> | <input type="radio"/> |
| There will be reduced time to having a clear patient plan        | <input type="radio"/> | <input type="radio"/> | <input type="radio"/> | <input type="radio"/> | <input type="radio"/> | <input type="radio"/> |
| The health care process will be improved overall                 | <input type="radio"/> | <input type="radio"/> | <input type="radio"/> | <input type="radio"/> | <input type="radio"/> | <input type="radio"/> |
| There will be improved time to surgical review                   | <input type="radio"/> | <input type="radio"/> | <input type="radio"/> | <input type="radio"/> | <input type="radio"/> | <input type="radio"/> |
| There will be improved time to pain team review                  | <input type="radio"/> | <input type="radio"/> | <input type="radio"/> | <input type="radio"/> | <input type="radio"/> | <input type="radio"/> |
| There will be decreased access to equipment                      | <input type="radio"/> | <input type="radio"/> | <input type="radio"/> | <input type="radio"/> | <input type="radio"/> | <input type="radio"/> |

Any further comments?

---

(Free text)
